# Supplementary material
Source: Springer Nature journal article supplement (https://www.springermedizin.de/resource/supplementary/12987_2007_288_MOESM7_ESM.pdf/9611726)

Lesion  
frequency

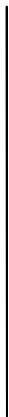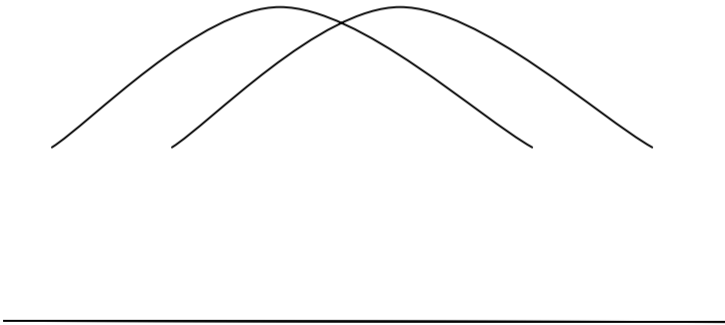

Increasing posterior fossa size or decreasing lesion level

Supplement: MOESM7 [file 9611726]
